# Supplementary material for: Realizing multiferroics in α-Ga2S3via hole doping: a first-principles study
Source: Royal Society of Chemistry journal article supplement (doi:10.1039/d3nr06661d), 2024-01-01
Supplement: d3nr06661d1.pdf [file d3nr06661d1.pdf]

## Supporting Information of

### Realizing Multiferroics in $\alpha$ -Ga<sub>2</sub>S<sub>3</sub> via Hole-doping: A First-Principles Study

*Junwen Zhong<sup>1,2</sup>, Peng Wu<sup>1</sup>, Zengying Ma<sup>2</sup>, Xueqian Xia<sup>2,3</sup>, Bowen Song<sup>1</sup>, Yanghong Yu<sup>3</sup>, Sufan Wang<sup>1,3,\*</sup>, Yucheng Huang<sup>1,2\*</sup>*

<sup>1</sup>College of Chemistry and Material Science, Key Laboratory of Functional Molecular Solids, Ministry of Education, Anhui Normal University, Wuhu 241000, China

<sup>2</sup>Anhui Key Laboratory of Molecule-Based Materials, Anhui Carbon Neutrality Engineering Center, Anhui Normal University, Wuhu 241000, China

<sup>3</sup>Key Laboratory of Electrochemical Clean Energy of Anhui Higher Education Institutes, Anhui Provincial Engineering Laboratory of New-Energy Vehicle Battery Energy-Storage Materials, Anhui Normal University, Wuhu 241000, China

**E-mail:** [sfwang@mail.ahnu.edu.cn](mailto:sfwang@mail.ahnu.edu.cn); [huangyc@mail.ahnu.edu.cn](mailto:huangyc@mail.ahnu.edu.cn)

### NOTE 1: Test of functionals

The choice of functionals, i.e., PBE, HSE06, PBE0, and B3LYP, were carefully tested by comparing the calculated lattice parameters, band gaps, and the formation energies of  $V_{\text{Ga}}$  with the available theoretical results at the same level of theory in literatures. As listed in Table S1, the lattice parameters are insensitive to the functionals while the band gap calculated at the level of HSE06 and B3LYP is close to each other. On the other hand, for the formation energies, the PBE level gives the same results to those of HSE06, which is lower in  $\sim 0.2$  eV to those of B3LYP. Thus, in our work, we used the PBE functional to optimize the geometries and obtain the total energy while adopted the HSE06 functional to calculate the electronic properties.

**TABLE S1.** The lattice constant  $a$ , band gap  $E_g$  of the pristine  $\alpha\text{-Ga}_2\text{S}_3$ , and formation energy  $E_f$  of  $V_{\text{Ga}}$  under Ga-rich and S-rich conditions are calculated by PBE, HSE06, PBE0, and B3LYP functionals.

|         | Pristine $\alpha\text{-Ga}_2\text{S}_3$ unit cell |                       | Intrinsic defect gallium vacancy |                |
|---------|---------------------------------------------------|-----------------------|----------------------------------|----------------|
|         | $a$                                               | $E_g$                 | $E_f$ (Ga-rich)                  | $E_f$ (S-rich) |
|         | Å                                                 | eV                    |                                  | eV             |
| PBE     | 3.62                                              | 1.74                  | 3.47                             | 2.52           |
| HSE06   | 3.62                                              | 2.68                  | 3.47                             | 2.52           |
| PBE0    | 3.62                                              | 3.42                  | 4.24                             | 3.29           |
| B3LYP   | 3.64                                              | 3.07                  | 3.70                             | 2.75           |
| Ref.[1] | $3.59^{\text{PBE}}$                               | $1.79^{\text{PBE}}$   |                                  |                |
| Ref.[2] |                                                   | $2.71^{\text{HSE06}}$ |                                  |                |

### NOTE 2: Calculation method of ferroelectrics

The in-plane and out-of-plane electric polarizations were calculated by Berry Phase method<sup>3</sup> based on the optimized geometrics, and the total polarization can be expressed as the sum of ion and electron components  $\Delta P_{\text{tot}} = \Delta P_{\text{ion}} + \Delta P_{\text{elec}}$ . The SSNEB method (Solid State Nudged Elastic Band method)<sup>4</sup> was applied to calculate the energy barrier of kinetic process. In this method, the total energy was expressed

by Landau-Ginzburg expansion<sup>5</sup>:

$$E = \sum_i \frac{A}{2} p_i^2 + \frac{B}{4} p_i^4 + \frac{C}{6} p_i^6 + \frac{D}{2} \sum_{\langle i,j \rangle} (p_i - p_j)^2 \quad (\text{S-1})$$

Here,  $P_i$  is the polarization of each unit cell, A, B, C, D are Landau coefficients, and  $i, j$  denotes the nearest neighbors. The first three terms of the equation describe an anharmonic double-well potential, and the last term captures the dipole-dipole coupling between the nearest adjacent neighbors, which can be approximated by using the mean field theory and assuming that only the nearest neighbor interaction exists.

### NOTE 3: Calculation method of intrinsic defects

We used defect formation energy to estimate the stability of different defects. The formation energy of the charged defect  $\Delta H_{D,q}$ <sup>6,7,8</sup> is defined as:

$$\Delta H_{D,q} = E_{D,q} - E_H - \sum_{\alpha} n_{\alpha} \mu_{\alpha} + q(E_F + E_V + \Delta V) \quad (\text{S-2})$$

Here,  $E_{D,q}$  represents the total energy of the supercell of the defect when the charge state is  $q$ , and  $E_H$  is the total energy of the perfect supercell with the same size.  $n_{\alpha}$  ( $\alpha$  represents Ga or S atoms) refers to the number of atoms taken from the supercell model ( $n_{\alpha} < 0$ ) or added ( $n_{\alpha} > 0$ ) to form defects in the supercell, and  $\mu_{\alpha}$  is the chemical potential of the atom.  $q$  represents the number of electrons transferred from the defect energy level to the top of the valence band (acceptor defect,  $q < 0$ ) or the bottom of the conduction band (donor defect,  $q > 0$ )<sup>9</sup>.  $E_F$  is the Fermi energy level relative to the VBM energy position in the perfect  $\alpha$ -Ga<sub>2</sub>S<sub>3</sub> supercell, and the eigenvalues in different supercells should be aligned with the same reference energy level (the valence band top of the perfect material).  $\Delta V$  is the potential correction, which is used to align the electrostatic potential between the pure crystal cell and the defect system of the same size. The specific calculation is the defect electrification correction divided by the real part of optical absorption coefficient of the perfect  $\alpha$ -Ga<sub>2</sub>S<sub>3</sub> supercell.

For the calculation of formation energies and thermodynamic transition energy levels, we simulated two different growth conditions, i.e., rich gallium (Ga-rich) and

rich sulfur (S-rich). To avoid the formation of gallium or sulfur bulks, the chemical potential of gallium or sulfur must be less than their respective bulk values<sup>9,10</sup>. As shown in Fig. S1, the upper limits of the chemical potential of Ga and S bulk phases are shown by black vertical lines and parallel lines, respectively. In order to achieve uniform growth of  $\alpha$ -Ga<sub>2</sub>S<sub>3</sub> crystals, the chemical potentials of Ga and S atoms must be consistent with the following constraints:

$$\mu_{\text{Ga}_2\text{S}_3} = 2\mu_{\text{Ga}} + 3\mu_{\text{S}} \quad (\text{S-3})$$

$\mu_{\text{Ga}_2\text{S}_3}$  represents the chemical potential of  $\alpha$ -Ga<sub>2</sub>S<sub>3</sub> monolayer. The above formula gives the equilibrium growth conditions: if the sum of  $\mu_{\text{Ga}}$  and  $\mu_{\text{S}}$  is greater than  $\mu_{\text{Ga}_2\text{S}_3}$ , the balance will move to the left, resulting in non-uniform growth of  $\alpha$ -Ga<sub>2</sub>S<sub>3</sub> crystals; if the sum of the two terms on the right is less than  $\mu_{\text{Ga}_2\text{S}_3}$ ,  $\alpha$ -Ga<sub>2</sub>S<sub>3</sub> will decompose. The calculated formation energy of  $\alpha$ -Ga<sub>2</sub>S<sub>3</sub> is -22.40 eV per molecular formula, which is expressed by the blue solid line.

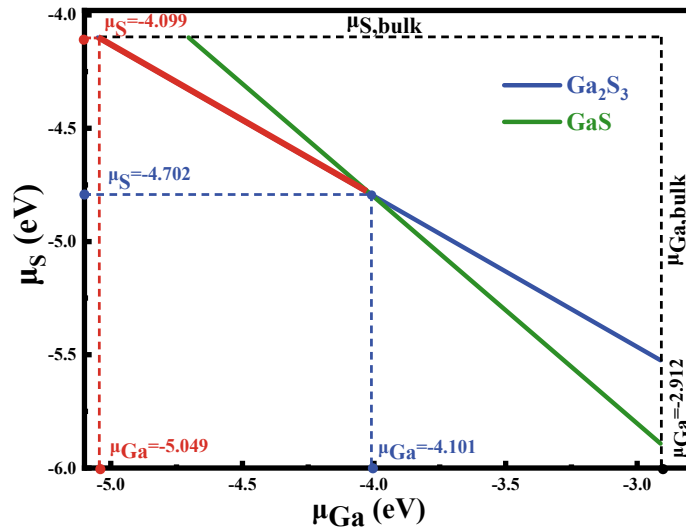

### Thermodynamic growth condition of $\alpha$ -Ga<sub>2</sub>S<sub>3</sub> crystal.

The black horizontal and vertical dashed lines represent the upper limits of sulfur and gallium, which are determined by the natural phases of sulfur and gallium. The solid blue and green lines give the conditions for the balanced growth of  $\alpha$ -Ga<sub>2</sub>S<sub>3</sub> and GaS. The allowable range of conditions for balanced growth of  $\alpha$ -Ga<sub>2</sub>S<sub>3</sub> crystals is marked with red thick solid lines.

In addition, for the  $\alpha$ -Ga<sub>2</sub>S<sub>3</sub>, another phase of GaS may coexist in the system. Compared with  $\alpha$ -Ga<sub>2</sub>S<sub>3</sub>, the gallium/sulfur ratio of GaS is higher, indicating that the effective growth of GaS phase tends to be in Ga-rich condition. To restrain the formation of this unwanted phase, the growth conditions must be limited below the upper limit of  $\mu_{\text{Ga}}$ . Under the thermodynamic equilibrium of GaS, the chemical potentials of gallium and sulfur atoms must satisfy the following constraint conditions:

$$\mu_{\text{GaS}} = \mu_{\text{Ga}} + \mu_{\text{S}} \quad (\text{S-4})$$

The calculated formation energy of GaS is -8.803 eV per molecular formula, and the solid green line in Fig. S1 marks the growth conditions of GaS. It can be seen from the figure that the lines corresponding to formulas (S-3) and (S-4) intersect at  $\mu_{\text{Ga}} = -4.101$  eV ( $\mu_{\text{S}} = -4.702$  eV). With the increase of  $\mu_{\text{Ga}}$ , the formation energy of  $\alpha$ -Ga<sub>2</sub>S<sub>3</sub> is higher than that of GaS, which means that the GaS phase will take the place of  $\alpha$ -Ga<sub>2</sub>S<sub>3</sub> in the Ga-rich condition. Therefore, we believe that  $\mu_{\text{Ga}} = -4.101$  eV is the real upper limit of  $\alpha$ -Ga<sub>2</sub>S<sub>3</sub> growth. The red solid line clearly marks the chemical potential range in which  $\alpha$ -Ga<sub>2</sub>S<sub>3</sub> can grow in equilibrium.

The transition energy level  $\varepsilon(q/q')$  of a defect refers to the Fermi energy level when the defect changes from the charged state of  $q$  to the charged state of  $q'$ , and the defect formation energy corresponding to the two different valence states is equal. It can be seen from the formula (S-2) that the formation energy of neutral defects does not change with the position of the Fermi level, but for charged defects, the formation energy changes. The conversion energy level is calculated as<sup>10,11</sup>:

$$\varepsilon(q/q') = \frac{\Delta H_{\text{D},q} - \Delta H_{\text{D},q'}}{q - q'} \quad (\text{S-5})$$

Except for the neutral state, the valence states of all the intrinsic defects considered in this paper range from -2 to +3. Since not all the valence states are stable for these intrinsic defects, only the most stable valence states were discussed.

**NOTE 4: Test of supercell size**

For the pristine Ga<sub>2</sub>S<sub>3</sub> monolayer, constructing the size of  $3 \times 3 \times 1$  supercell is a conventional choice. For the defective Ga<sub>2</sub>S<sub>3</sub> monolayer, the sizes of  $2 \times 2 \times 1$ ,  $3 \times 3 \times 1$ ,  $4 \times 4 \times 1$  and  $5 \times 5 \times 1$  were tested using the calculated formation energies  $V_{\text{Ga}}$  as the convergence criterion. As tabulated in Table S2, the results of  $3 \times 3 \times 1$  supercell deviate slightly to those of  $5 \times 5 \times 1$  one. Taking into consideration both computational economy and accuracy, the size of  $3 \times 3 \times 1$  supercell was chosen in our investigation.

**TABLE S2.** Test of supercell size using the calculated formation energies  $V_{\text{Ga}}$  as the convergence criterion.

| Supercell size        | Number of atoms | $E_f$ (Ga-rich) | $E_f$ (S-rich) |
|-----------------------|-----------------|-----------------|----------------|
|                       |                 | eV              |                |
| $2 \times 2 \times 1$ | 19              | 3.65            | 2.71           |
| $3 \times 3 \times 1$ | 44              | 3.47            | 2.52           |
| $4 \times 4 \times 1$ | 79              | 3.42            | 2.47           |
| $5 \times 5 \times 1$ | 124             | 3.40            | 2.45           |

**NOTE 5: Validation of FM for the  $V_{\text{Ga}}$**

To validate the FM, we double the size of the supercell by placing two 45-atom units side by side, *i.e.*, two  $V_{\text{Ga}}$  centers are placed equidistantly in the 90-atom supercell. The distance between two adjacent  $V_{\text{Ga}}$  is 10.88 Å. Depending on the initial spin alignments, self-consistent calculations give two stable spin configurations: one is ferromagnetic (FM), the other is antiferromagnetic (AFM). The energetic difference between the two phases,  $\Delta E = E_{\text{AFM}} - E_{\text{FM}}$ , is used to evaluate the magnetic interactions. For one hand, the magnetic moment with two  $V_{\text{Ga}}$  defects is 4.66  $\mu_{\text{B}}$ , which is slightly less than twice of a single  $V_{\text{Ga}}$  (2.39  $\mu_{\text{B}}$ ). On the other hand, the energy difference  $\Delta E$  is +25 meV, which proves that the coupling between the two defects is a kind of FM. The spin density of one  $V_{\text{Ga}}$  in 45-atom and two  $V_{\text{Ga}}$  in 90-atom supercell are depicted in the following figure, which also clearly supports the FM coupling for the  $V_{\text{Ga}}$ .

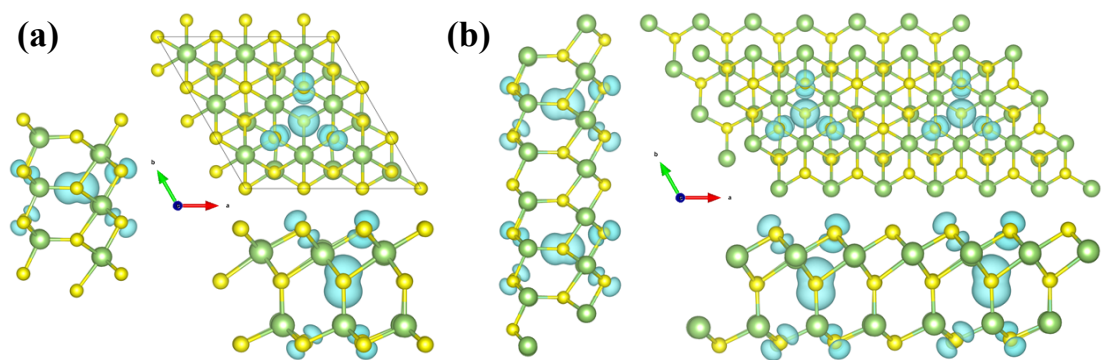

(a) Spin density of  $V_{\text{Ga}}$  in a  $3 \times 3 \times 1$  supercell; (b) Spin density of  $V_{\text{Ga}}$  in a  $6 \times 3 \times 1$  supercell.

Supporting Figures:

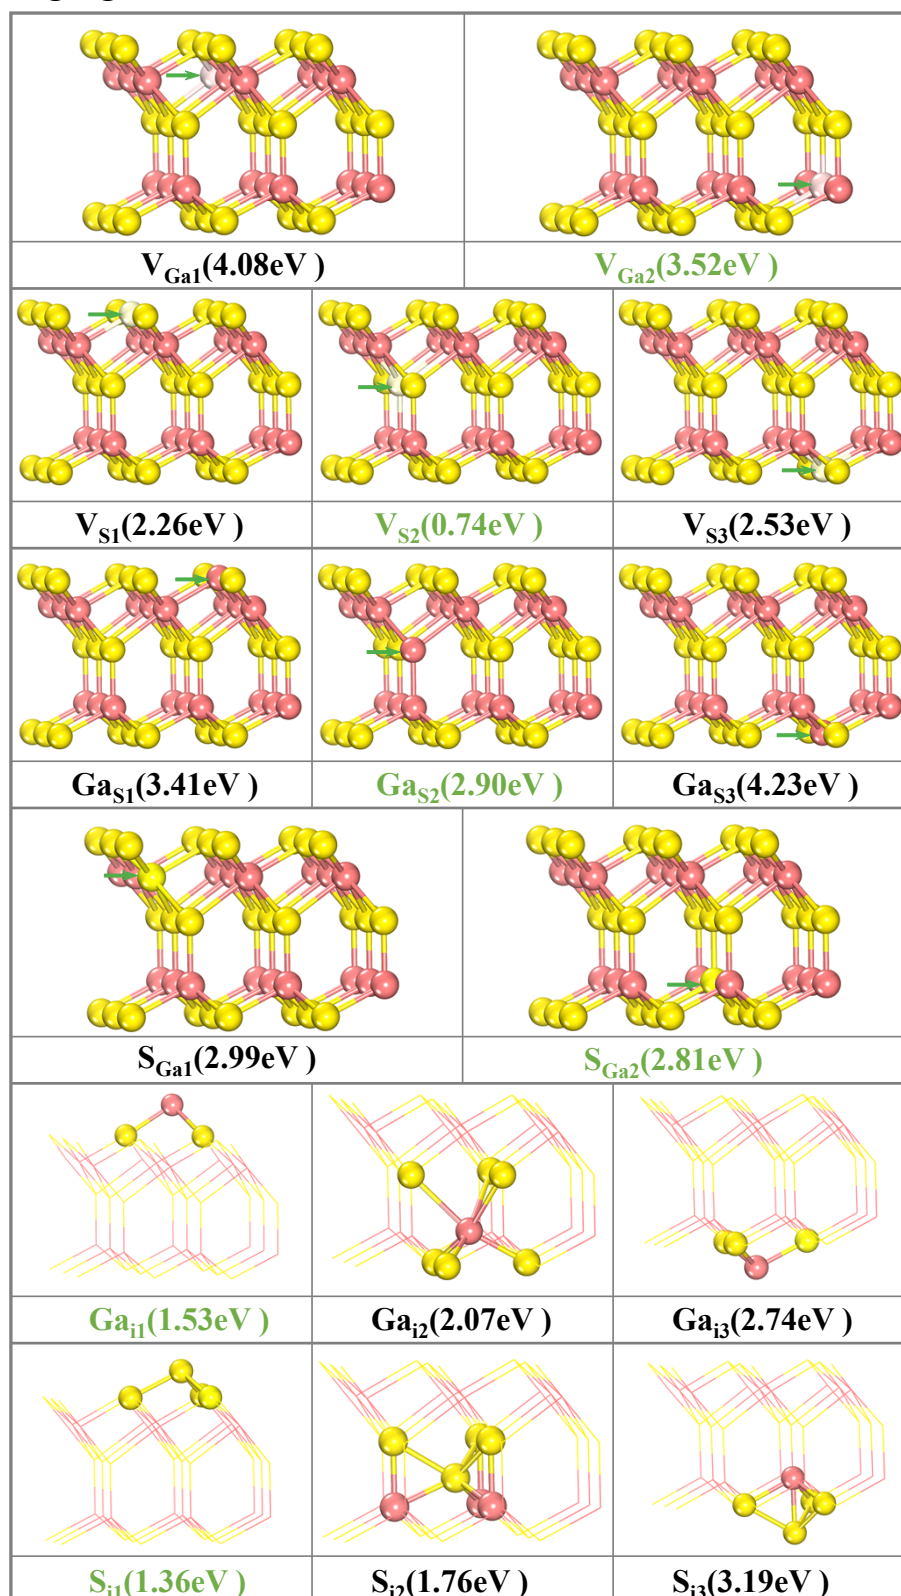

FIG. S1 Various possible configurations of defects. The numbers are the corresponding formation energies of each considered structure under the Ga-rich condition, in which the one marked with green is the most stable configuration.



**FIG. S2** Variations of the temperature and total energy vs time for AIMD simulations of pristine  $\alpha$ -Ga<sub>2</sub>S<sub>3</sub> monolayer and  $V_{\text{Ga}}$ . The simulations last 5 ps with a time step of 1.0 fs, and the temperature was set to 300 K. Insets are the side views of snapshots at 5 ps.

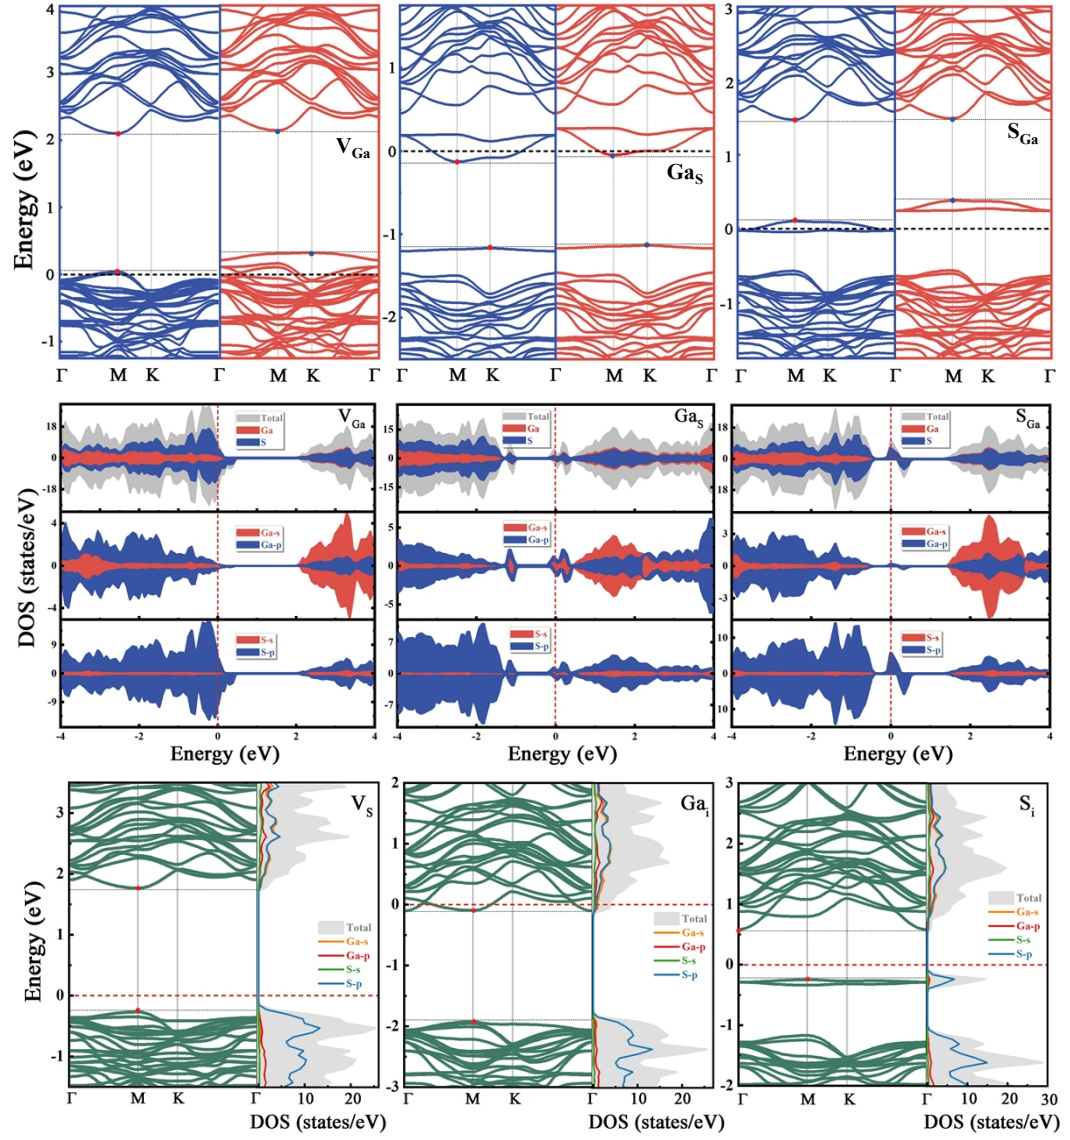

**FIG. S3** Band Structures and density of states (DOS) of  $\alpha$ -Ga<sub>2</sub>S<sub>3</sub> with various intrinsic defects.

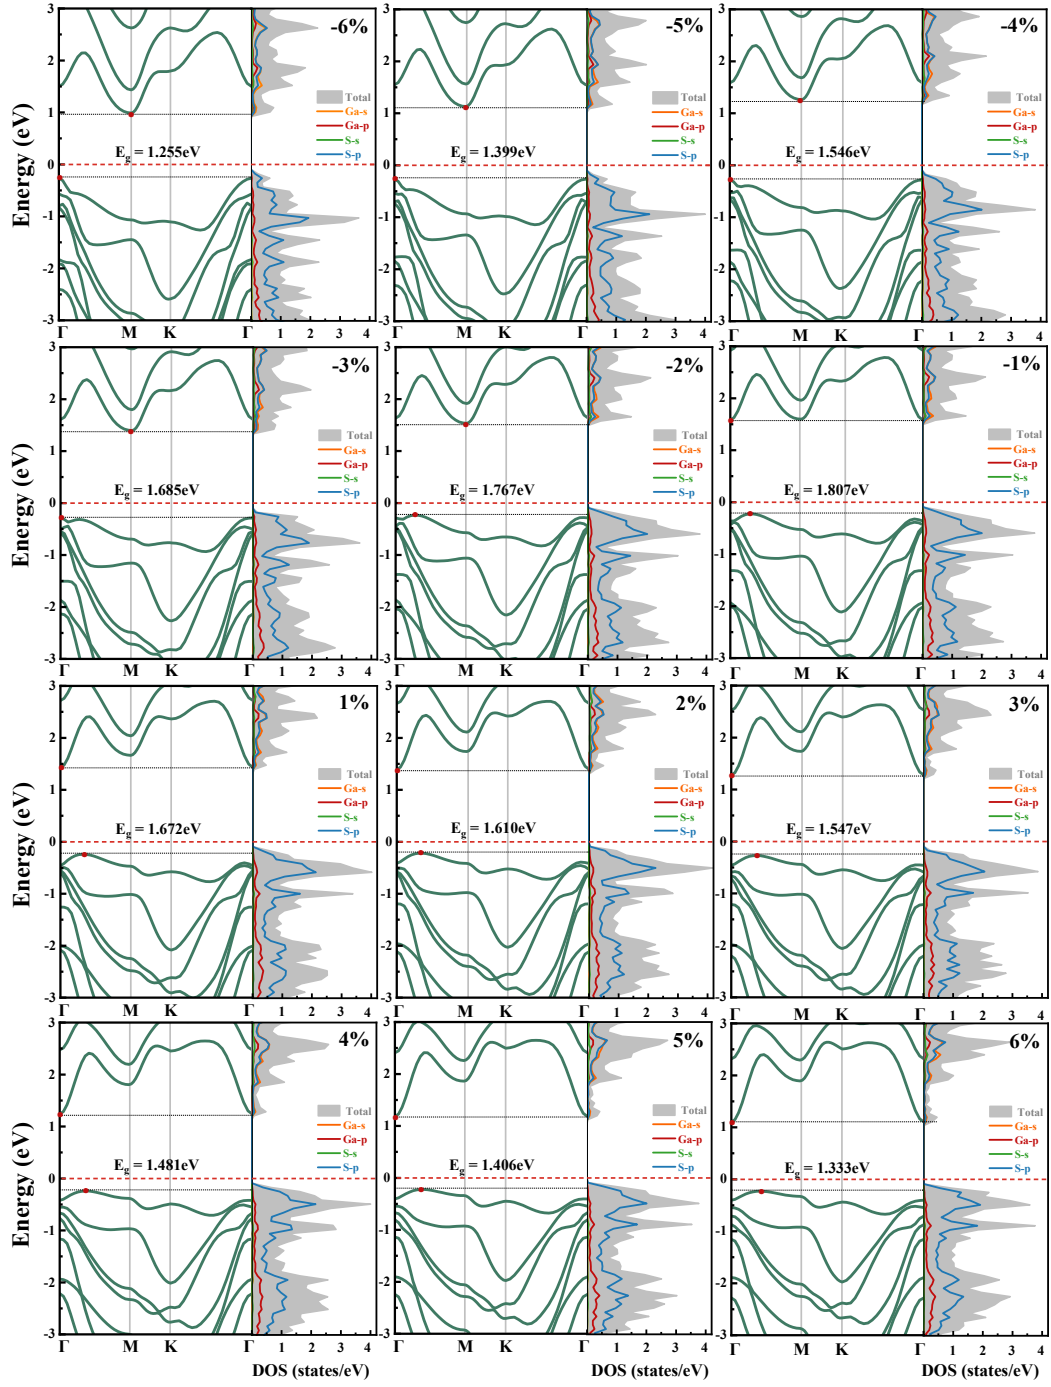

FIG. S4 Band structures and DOS of  $\alpha$ -Ga<sub>2</sub>S<sub>3</sub> under uniaxial strain.

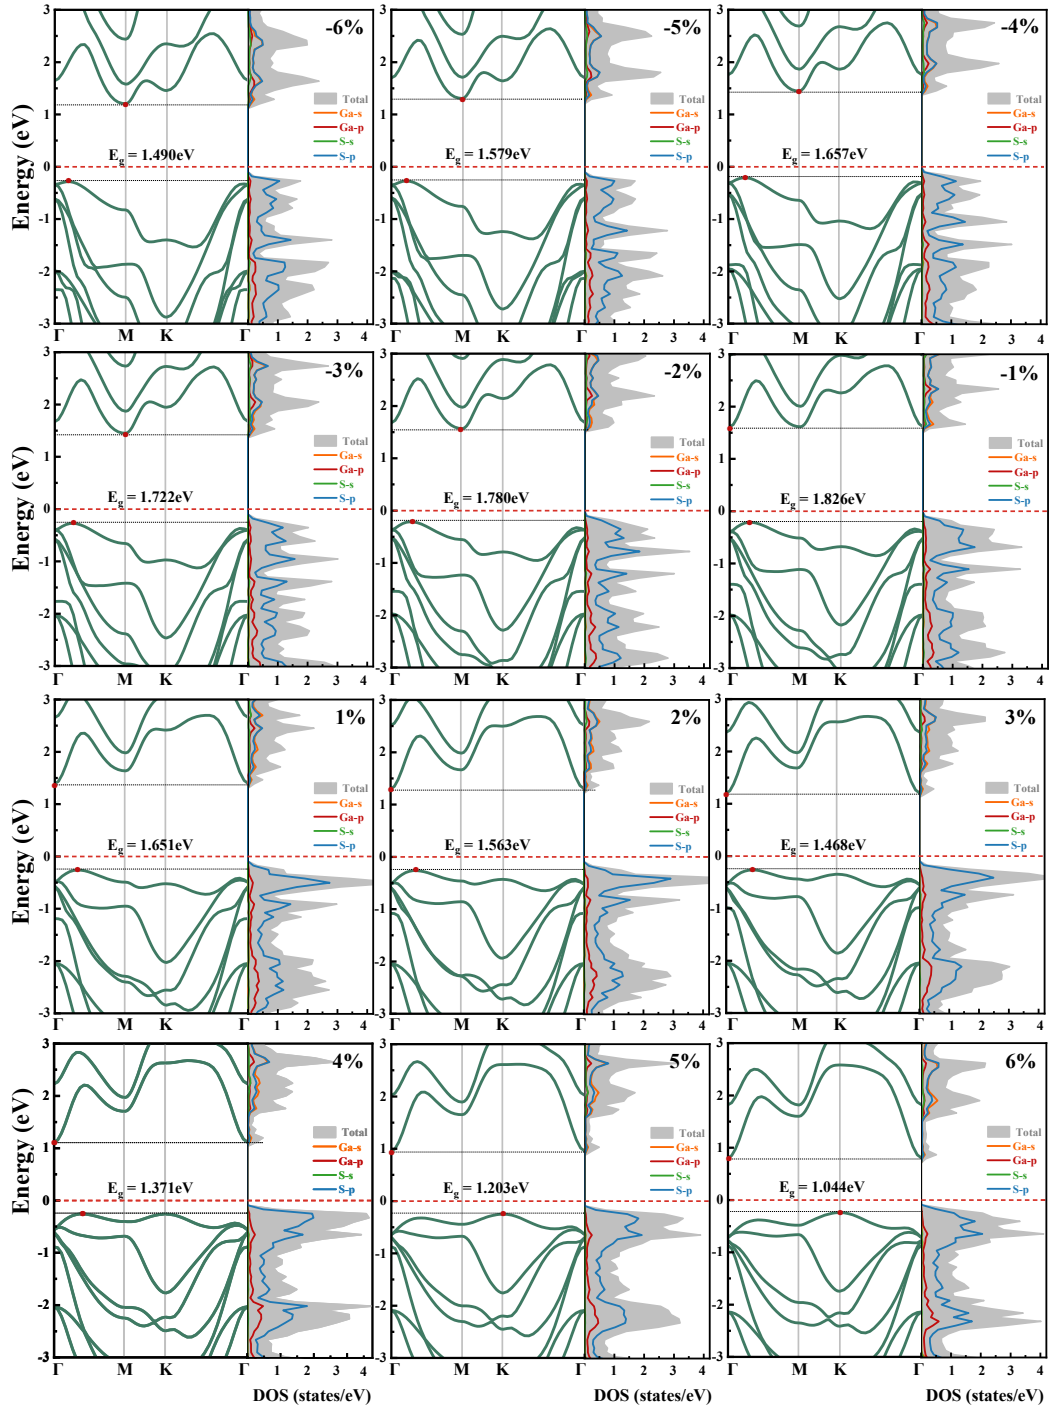

FIG. S5 Band structures and DOS of  $\alpha$ -Ga<sub>2</sub>S<sub>3</sub> under biaxial strain.

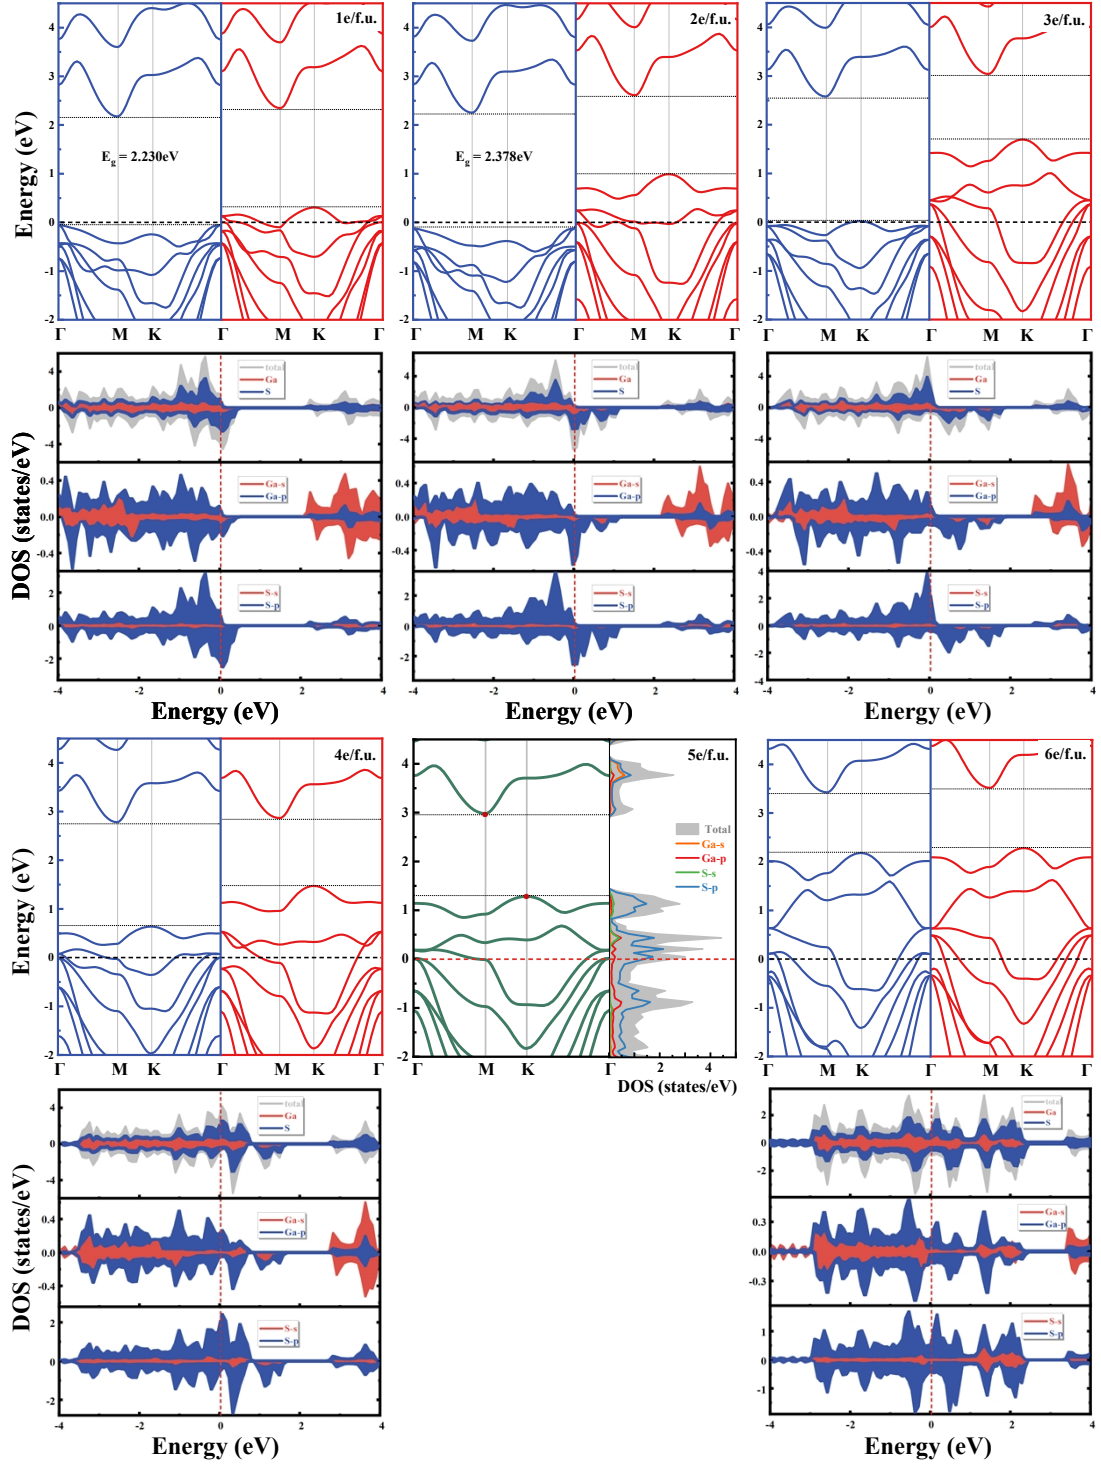

FIG. S6 Band Structures and DOS of  $\alpha$ -Ga<sub>2</sub>S<sub>3</sub> at the doping concentration of 1e/f.u. ~ 6e/f.u.

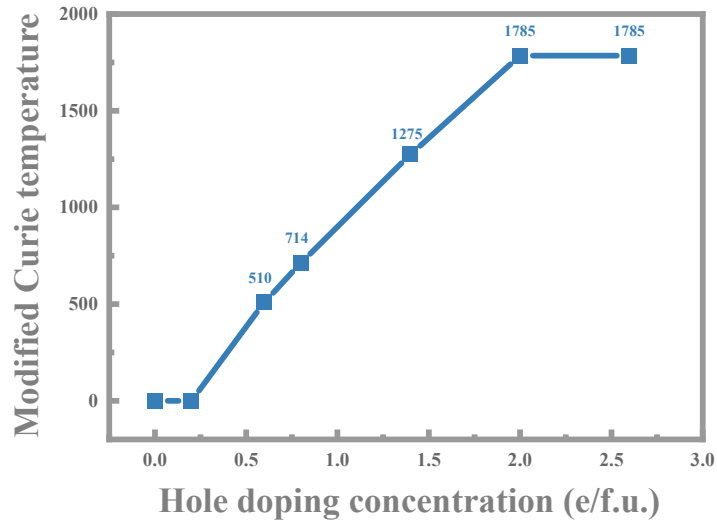

**FIG. S7** The modified Curie temperature with hole-doping. Here, the modified  $T_C$  are calculated from the empirical relation ( $T_C/T_C^{\text{FM}} = 0.51$ , where the  $T_C^{\text{FM}}$  is the value obtained from the mean field method).

**FIG. S8** Changes of out-of-plane spontaneous polarization and magnetic moment along the structures of ferroelectric switch path at the hole-doping concentration of 6 e/f.u. in pristine  $\alpha$ -Ga<sub>2</sub>S<sub>3</sub> monolayer.

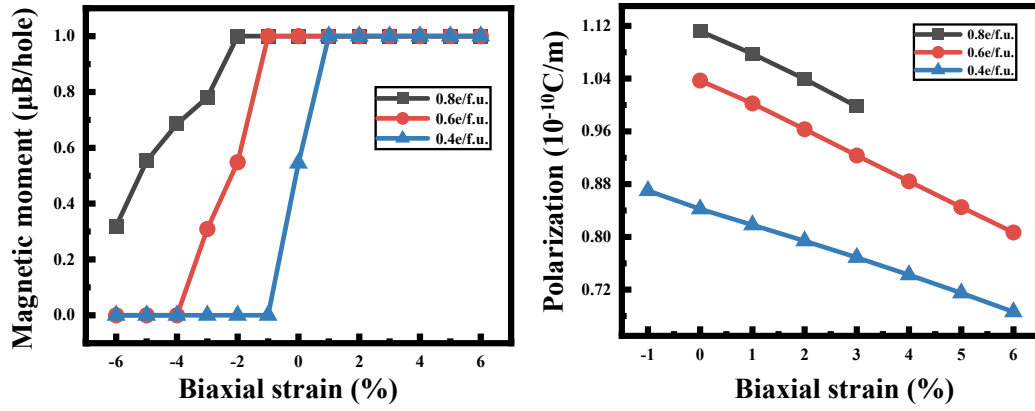

FIG. S9 Magnetic moment and  $P_{\text{out-of-plane}}$  variation of different hole doping concentrations under biaxial strain.



**Structures (readable by VASP)**

POSCAR of FE phase

Ga S

1.0

|                     |                    |                     |
|---------------------|--------------------|---------------------|
| 3.6257998943000000  | 0.0000000000000000 | 0.0000000000000000  |
| -1.8128999472000000 | 3.1400348175000001 | 0.0000000000000000  |
| 0.0000000000000000  | 0.0000000000000000 | 23.9799995422000016 |

Ga S

2 3

Direct

|                    |                    |                    |
|--------------------|--------------------|--------------------|
| 0.6666666870000000 | 0.3333333430000000 | 0.4261800050000000 |
| 0.3333333430000000 | 0.6666666870000000 | 0.5820400120000000 |
| 0.6666666870000000 | 0.3333333430000000 | 0.5186600090000000 |
| 0.0000000000000000 | 0.0000000000000000 | 0.6298400159999999 |
| 0.0000000000000000 | 0.0000000000000000 | 0.3819899860000000 |

CONTCAR of PE phase

Ga S

1.0000000000000000

|                     |                    |                     |
|---------------------|--------------------|---------------------|
| 3.5347524519648537  | 0.0000000000000000 | 0.0000000000000000  |
| -1.7667983159310483 | 3.0618323967901540 | 0.0000000000000000  |
| -4.7867835502522516 | 2.8354013709060251 | 22.6445722957090005 |

Ga S

2 3

Direct

|                    |                    |                    |
|--------------------|--------------------|--------------------|
| 0.7639463216560429 | 0.2354848569522616 | 0.4252212230887196 |
| 0.2343825334817069 | 0.7663537199392678 | 0.5744004124108599 |
| 0.4992267664968750 | 0.5004949630778199 | 0.4998117570942995 |
| 0.9469904052064919 | 0.0520547136791265 | 0.6258872015620227 |
| 0.0513567037128837 | 0.9496991945127249 | 0.3737338988704053 |

CONTCAR of V<sub>Ga</sub>

Ga S

1.0000000000000000

|                     |                    |                     |
|---------------------|--------------------|---------------------|
| 10.8774003983000007 | 0.0000000000000000 | 0.0000000000000000  |
| -5.4387001991000004 | 9.4201050720000001 | 0.0000000000000000  |
| 0.0000000000000000  | 0.0000000000000000 | 23.9799995422000016 |

Ga S

17 27

Direct

|                     |                     |                    |
|---------------------|---------------------|--------------------|
| 0.2273095009119601  | 0.1210639697125916  | 0.4240638131617041 |
| 0.1101402383383326  | 0.2217351221691684  | 0.5806758084526423 |
| 0.5604244638006378  | 0.1210639697125916  | 0.4240638131617041 |
| 0.4438506362837589  | 0.2210412625675238  | 0.5771213612242694 |
| 0.8888900279999987  | 0.1111100019999967  | 0.4235766632755147 |
| 0.7782648778308315  | 0.2217351221691684  | 0.5806758084526423 |
| 0.2273095009119601  | 0.4395755361993621  | 0.4240638131617041 |
| 0.1108384417249407  | 0.5550168724498913  | 0.5827983511089101 |
| 0.4438506362837589  | 0.5561493637162412  | 0.5771213612242694 |
| 0.8789360602874038  | 0.4395755361993621  | 0.4240638131617041 |
| 0.7789587374324761  | 0.5561493637162412  | 0.5771213612242694 |
| 0.2222200040000004  | 0.7777799959999996  | 0.4262048280239666 |
| 0.1108384417249407  | 0.8891615882750552  | 0.5827983511089101 |
| 0.5604244638006378  | 0.7726904990880399  | 0.4240638131617041 |
| 0.4449831275501092  | 0.8891615882750552  | 0.5827983511089101 |
| 0.8789360602874038  | 0.7726904990880399  | 0.4240638131617041 |
| 0.7782648778308315  | 0.8898597916616630  | 0.5806758084526423 |
| 0.2195577992323946  | 0.1082910915570775  | 0.5187852185644813 |
| -0.0007205489378301 | 0.0007205489378301  | 0.6311610539100468 |
| 0.0008297614039787  | -0.0008297614039787 | 0.3831656472094072 |
| 0.5554032873246895  | 0.1082910915570775  | 0.5187852185644813 |

0.3345236641121723 0.0023873182243437 0.6309485700575650  
0.3333228298340168 -0.0000143503319673 0.3838768311215942  
0.8888900279999987 0.1111100019999967 0.5180030064818831  
0.6681111218756587 0.0007205489378301 0.6311610539100468  
0.6650105011920411 -0.0008297614039787 0.3831656472094072  
0.2195577992323946 0.4445967126753105 0.5187852185644813  
-0.0007205489378301 0.3318889071243405 0.6311610539100468  
0.0008297614039787 0.3349895278079579 0.3831656472094072  
0.5555599930000028 0.4444400069999972 0.5182177844669846  
0.3343883663965142 0.3338591856982575 0.6287696642946233  
0.3483812590482098 0.3408556320241052 0.3878820461519274  
0.8917089384429178 0.4445967126753105 0.5187852185644813  
0.6661408433017417 0.3338591856982575 0.6287696642946233  
0.6591443969758939 0.3408556320241052 0.3878820461519274  
0.2222200040000004 0.7777799959999996 0.5200149808015513  
-0.0023873182243437 0.6654763648878265 0.6309485700575650  
0.0000143503319673 0.6666771991659821 0.3838768311215942  
0.5554032873246895 0.7804422007676057 0.5187852185644813  
0.3345236641121723 0.6654763648878265 0.6309485700575650  
0.3333228298340168 0.6666771991659821 0.3838768311215942  
0.8917089384429178 0.7804422007676057 0.5187852185644813  
0.6661408433017417 0.6656116626034844 0.6287696642946233  
0.6591443969758939 0.6516187699517890 0.3878820461519274

## References:

1. L. Hu and X. Huang, *RSC Adv.*, 2017, **7**, 55034-55043.
2. G. Zhang, K. Lu, Y. Wang, H. Wang and Q. Chen, *Phys. Rev. B*, 2022, **105**, 235303.
3. R. Resta, M. Posternak and A. Baldereschi, *Phys. Rev. Lett.*, 1993, **70**, 1010.
4. D. Sheppard, P. Xiao, W. Chemelewski, D. D. Johnson and G. Henkelman, *J. Chem. Phys.*, 2012, **136**, 074103.
5. R. Fei, W. Kang and L. Yang, *Phys. Rev. Lett.*, 2016, **117**, 097601.
6. S. Zhang and J. E. Northrup, *Phys. Rev. Lett.*, 1991, **67**, 2339.
7. G. Baraff and M. Schlüter, *Phys. Rev. Lett.*, 1985, **55**, 1327.
8. J. He, K. Wu, R. Sa, Q. Li and Y. Wei, *Appl. Phys. Lett.*, 2010, **96**, 082504.
9. S.-H. Wei, *Comput. Mater. Sci.*, 2004, **30**, 337-348.
10. H. Chen, C.-Y. Wang, J.-T. Wang, X.-P. Hu and S.-X. Zhou, *J. Appl. Phys.*, 2012, **112**, 084513.
11. S.-H. Wei and S. Zhang, *Phys. Rev. B*, 2002, **66**, 155211.
